# Supplementary material
Source: publisher figshare collection journal article supplement (https://acs.figshare.com/ndownloader/files/30934017)
Supplement: Supplementary file 1 [file 30934017]

Perovskite quantum dots for Lewis acid-base  
interaction and interface engineering in  
lithium-metal batteries

*Yuchen Wang<sup>#</sup>, Wen Li<sup>#</sup>, Zhong Xu, Yanting Xie, Yihan Wang, Haibo Zhao, Junfeng  
Huang, Weiqing Yang, Haitao Zhang<sup>\*</sup>*

Key Laboratory of Advanced Technologies of Materials, Ministry of Education,  
School of Materials Science and Engineering, Southwest Jiaotong University,  
Chengdu 610031, China

<sup>#</sup>These authors contributed equally to this work.

<sup>\*</sup>Corresponding author: [haitaozhang@swjtu.edu.cn](mailto:haitaozhang@swjtu.edu.cn) (H. T. Z.)

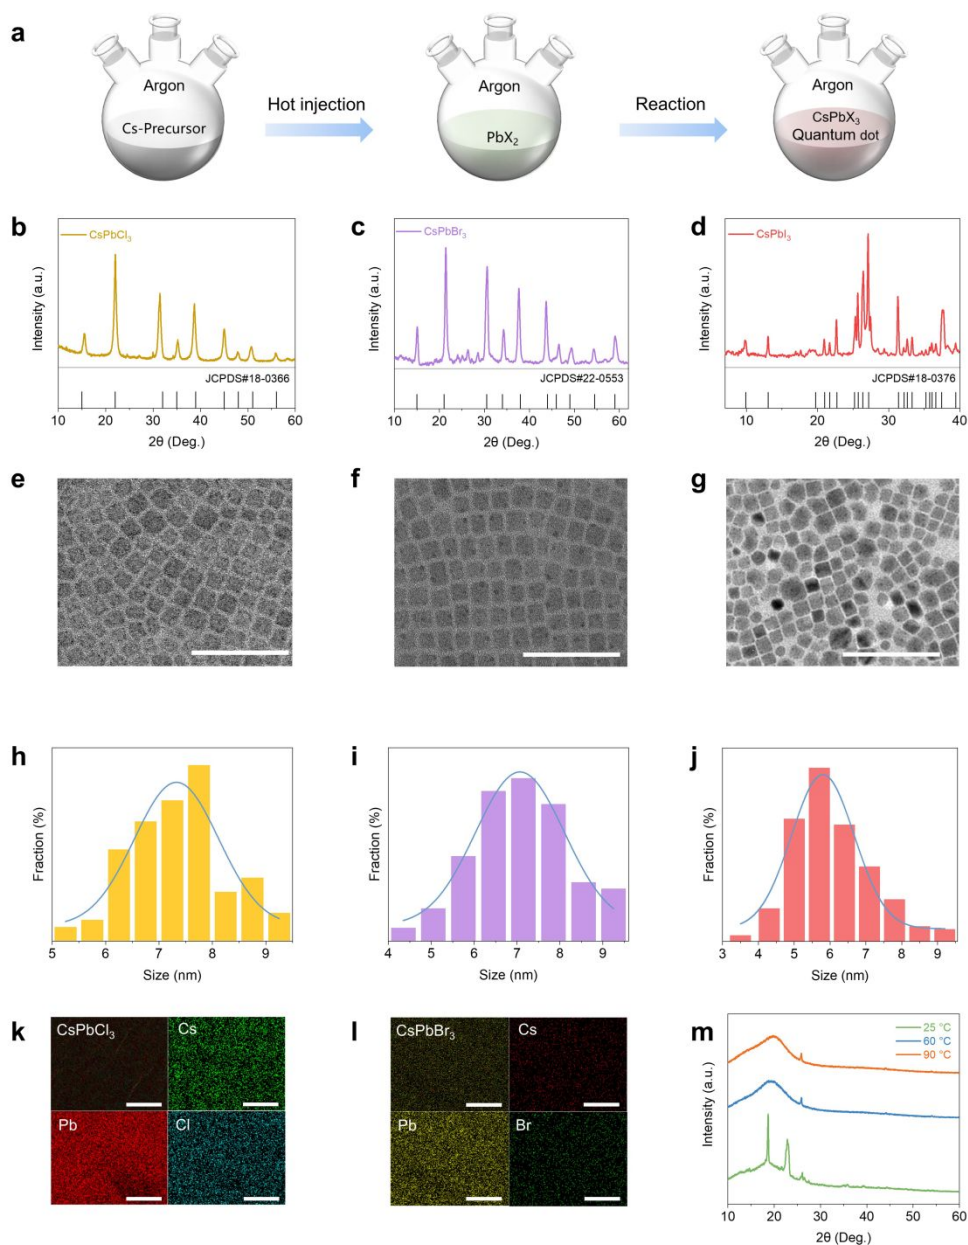

**Figure S1.** **a**, Detailed synthetic process of CsPbX<sub>3</sub> PQDs. **b**, **c**, **d**, XRD patterns of (b) CsPbCl<sub>3</sub>, (c) CsPbBr<sub>3</sub> and (d) CsPbI<sub>3</sub> PQDs. **e**, **f**, **g**, TEM images of (e) CsPbCl<sub>3</sub>, (f) CsPbBr<sub>3</sub> and (g) CsPbI<sub>3</sub> PQDs. **h**, **i**, **j**, Size distribution of (h) CsPbCl<sub>3</sub>, (i) CsPbBr<sub>3</sub> and (j) CsPbI<sub>3</sub> PQD particles with a normal distribution. **k**, **l**, EDX elemental analysis of (k) PEO-CsPbCl<sub>3</sub> and (l) PEO-CsPbBr<sub>3</sub> SSEs. **m**, XRD patterns of PEO-CsPbI<sub>3</sub> SSEs at 25 °C, 60 °C and 90 °C. Scale bars: 50 nm in **e**, **f** and **g**, and 25  $\mu$ m in **k** and **l**.

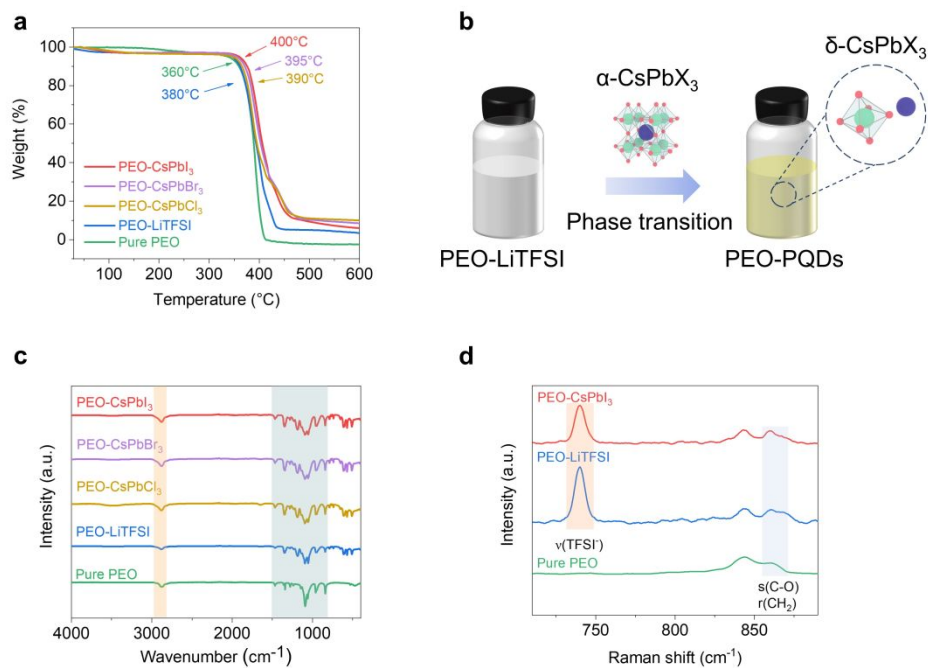

**Figure S2.** **a**, TGA curves of the thermal property of SSEs. **b**, The phase transition process of CsPbX<sub>3</sub> PQDs. **c**, FTIR spectra of pure PEO, PEO-LiTFSI, and PEO-CSPbX<sub>3</sub> SSEs at 4000-400 cm<sup>-1</sup>. **d**, Raman spectra of pure PEO, PEO-LiTFSI, and PEO-CSPbI<sub>3</sub> SSEs at 710-890 cm<sup>-1</sup>.

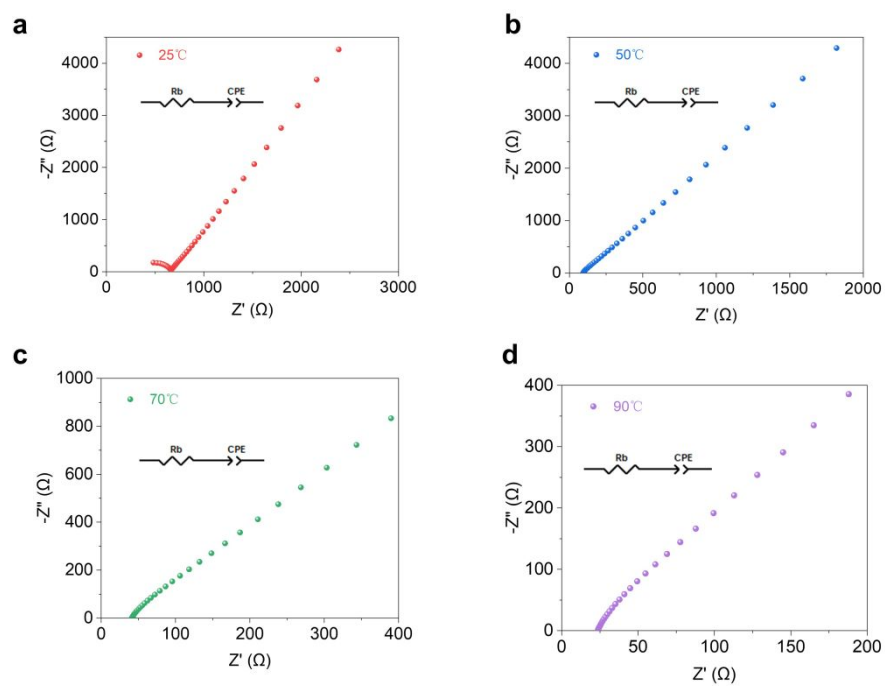

**Figure S3. a, b, c, d,** Nyquist plots of PEO-CsPbI<sub>3</sub> SSEs at **(a)**25 °C, **(b)**50 °C, **(c)**70 °C, **(d)**90 °C.

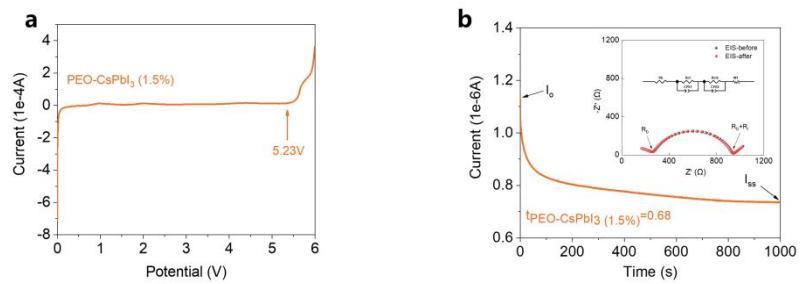

**Figure S4. a,** Electrochemical stability windows of 1.5% doped PEO-CsPbI<sub>3</sub> SSE. **b,**

Lithium-ion transference number of 1.5% doped PEO-CsPbI<sub>3</sub> SSE.

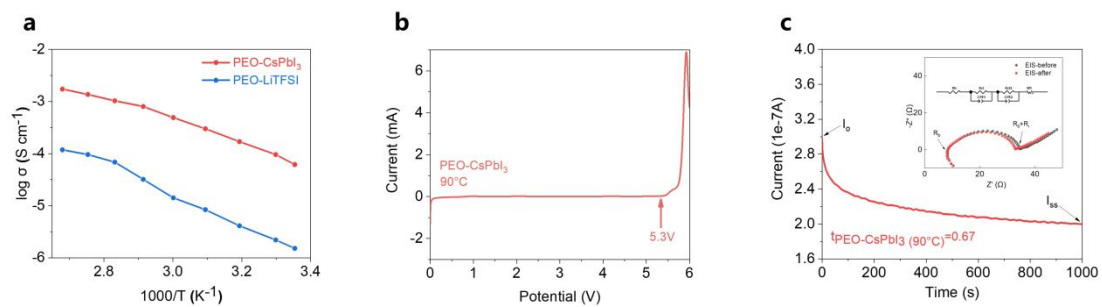

**Figure S5.** **a**, Arrhenius plots of ionic conductivity of PEO-CsPbI<sub>3</sub> and PEO-LiTFSI SSEs. **b**, Electrochemical stability window of PEO-CsPbI<sub>3</sub> SSE at 90 °C. **c**, Lithium-ion transference number of PEO-CsPbI<sub>3</sub> SSE at 90 °C.

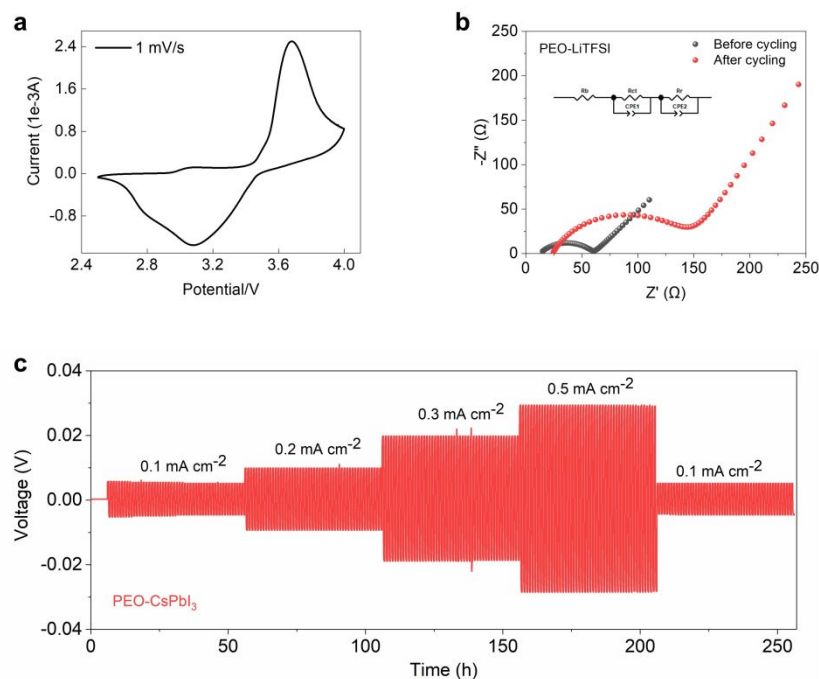

**Figure S6.** **a**, Cycling voltammetry curves of LMBs with PEO-CsPbI<sub>3</sub> SSEs at the rate of 1 mV s<sup>-1</sup> at 90°C, indicating the charging and discharging plateau is around 3.6 and 3.1 V, respectively. **b**, EIS spectra of Li/PEO-LiTFSI/LFP LMBs before and after 100 cycles at 0.1C at 90 °C. Inset: the equivalent circuit of the impedance spectra. **c**, Galvanostatic cycling curves of Li/PEO-CsPbI<sub>3</sub>/Li batteries at various current densities at 90°C.

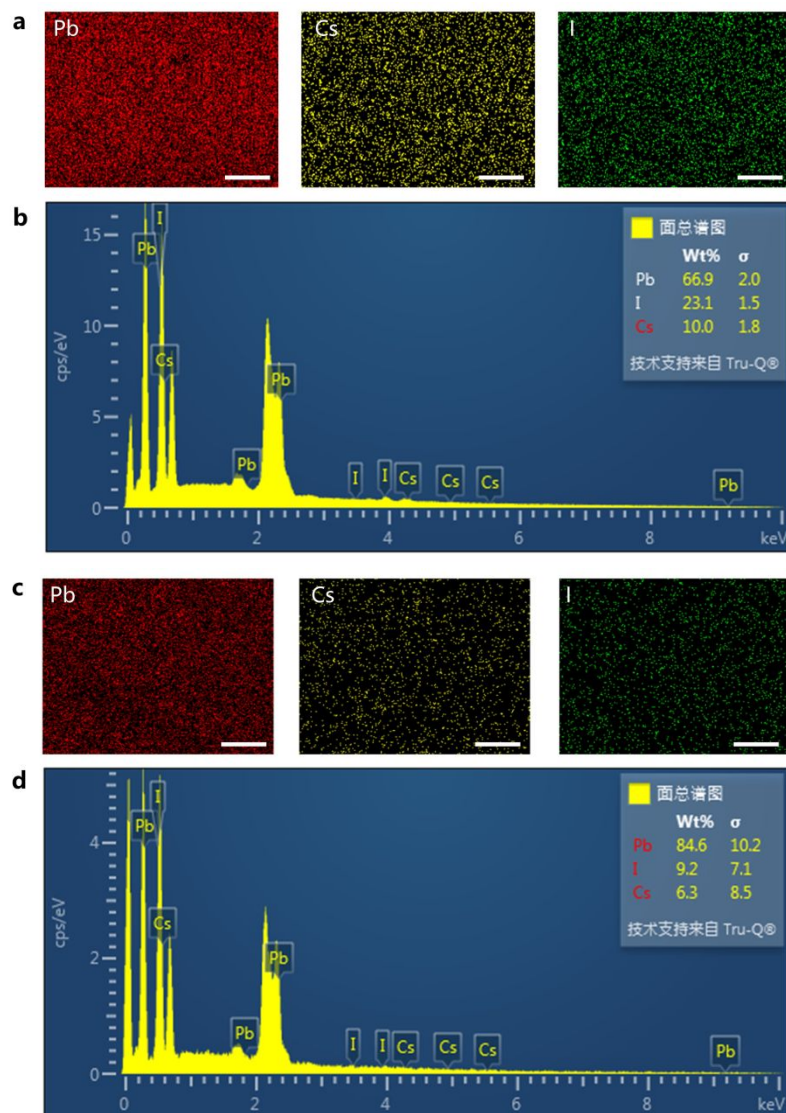

**Figure S7.** **a**, EDX elemental analysis of PEO-CsPbI<sub>3</sub> SSEs before battery test. **b**, element mass percentages of PEO-CsPbI<sub>3</sub> SSEs before battery test. **c**, EDX elemental analysis of PEO-CsPbI<sub>3</sub> SSEs after battery test. **d**, element mass percentages of PEO-CsPbI<sub>3</sub> SSEs after battery test.



**Table S1. Thermal properties of SSEs.**

| Sample                  | $T_g$ (°C) | $T_m$ (°C) | $\Delta H_m$ (J g <sup>-1</sup> ) | $\chi_c$ (%) |
|-------------------------|------------|------------|-----------------------------------|--------------|
| Pure PEO                | -56.5      | 62.62      | 156.69                            | 77.19        |
| PEO-LiTFSI              | -40.85     | 49.46      | 45.68                             | 22.50        |
| PEO-CsPbCl <sub>3</sub> | -48.24     | 44.45      | 38.61                             | 19.02        |
| PEO-CsPbBr <sub>3</sub> | -46.31     | 43.93      | 36.43                             | 17.95        |
| PEO-CsPbI <sub>3</sub>  | -50.03     | 42.13      | 33.14                             | 16.32        |

Where  $T_g$ ,  $T_m$ ,  $\Delta H_m$  and  $\chi_c$  represent the glass transition temperature, melting point, melting enthalpy and crystallinity, respectively.

**Table S2. FTIR peaks and assignments for SSEs.**

| Peak<br>Assignment      | Wavenumber/cm <sup>-1</sup> |            |                         |                         |                        |
|-------------------------|-----------------------------|------------|-------------------------|-------------------------|------------------------|
|                         | Pure PEO                    | PEO-LiTFSI | PEO-CsPbCl <sub>3</sub> | PEO-CsPbBr <sub>3</sub> | PEO-CsPbI <sub>3</sub> |
| $\gamma(\text{CH}_2)_a$ | 841                         | 842        | 842                     | 842                     | 842                    |
| $\gamma(\text{CH}_2)_s$ | 961                         | 959        | 959                     | 959                     | 959                    |
| $\omega(\text{CH}_2)_a$ | 1360                        | 1351       | 1351                    | 1351                    | 1351                   |
| $\nu(\text{COC})_s$     | 1059                        | 1056       | 1058                    | 1057                    | 1057                   |
| $\nu(\text{COC})_a$     | 1092                        | 1094       | 1091                    | 1091                    | 1091                   |
| $\nu(\text{CF}_3)_s$    |                             | 1185       | 1186                    | 1186                    | 1187                   |
| $\nu(\text{OH})$        | 3460                        | 3460       | 3460                    | 3460                    | 3460                   |

---

**Table S3. Raman peaks and assignments for SSEs.**

| Peak<br>Assignment    | Wavenumber/cm <sup>-1</sup> |               |                        |
|-----------------------|-----------------------------|---------------|------------------------|
|                       | Pure PEO                    | PEO-LiTFSI    | PEO-CsPbI <sub>3</sub> |
| r(CF <sub>3</sub> )   |                             | 275           | 277                    |
| r(SO <sub>2</sub> )   |                             | 311, 326, 342 | 309, 325, 338          |
| b(COC)                | 362                         | 362           | 362                    |
| v(TFSI <sup>-</sup> ) |                             | 740           | 740                    |
| s(C-O)                | 860                         | 860           | 860                    |
| r(CH <sub>2</sub> )   |                             |               |                        |
| t(CH <sub>2</sub> )   | 1280                        | 1280          | 1280                   |
| s(CF <sub>3</sub> )   |                             | 1242          | 1240                   |
| s(C-C)                | 1140                        | 1140          | 1140                   |
| s(C-O)                |                             |               |                        |
| s(SO <sub>2</sub> )   |                             | 1136          | 1140                   |
